# Supplementary material
Source: Research Square preprint supplement (doi:10.21203/rs.3.rs-9331253/v1)
Supplement: Supplementary file 1 [file e4d2c0b67d2fba17b3190538.docx]

**Supplementary Table 1** List of clinical and pathological factors for osteopenia group.

|  |  | Total | Osteopenia | |  |
| --- | --- | --- | --- | --- | --- |
|  |  |  | Yes | No |  |
|  |  | (n=273) | (n=111) | (n=162) | *P* |
| Sex | Male, n (%) | 189 (69.2) | 78 (70.3) | 111 (68.5) | 0.86 |
| Age (year) | median [IQR] | 68.0 [61.0, 76.0] | 74.0 [67.0, 81.0] | 64.0 [57.0, 71.8] | <0.001 |
| BMI (kg×m-2) | median [IQR] | 22.7 [20.3, 24.4] | 23.1 [20.2, 25.0] | 22.2 [20.5, 24.1] | 0.28 |
| Smoking | Yes, n (%) | 167 (61.2) | 68 (61.3) | 99 (61.1) | 1.00 |
| Neoadjuvant chemotherapy | Yes, n (%) | 18 (6.6) | 8 (7.2) | 10 (6.2) | 0.93 |
| CEA (mg/dl) | ≥ 5, n (%) | 33 (12.1) | 18 (16.2) | 15 (9.3) | 0.12 |
| CA19-9 (U/dl) | ≥ 37, n (%) | 13 (4.8) | 2 (1.8) | 11 (6.8) | 0.11 |
| PLR | ≥ 150, n (%) | 117 (42.9) | 46 (41.4) | 71 (43.8) | 0.79 |
| NLR | ≥ 2.5, n (%) | 96 (35.2) | 43 (38.7) | 53 (32.7) | 0.37 |
| CAR | ≥ 0.05, n (%) | 64 (23.4) | 32 (28.8) | 32 (19.8) | 0.11 |
| NRI | < 100, n (%) | 81 (29.7) | 36 (32.4) | 45 (27.8) | 0.49 |
| SII | ≥ 50x10^4, n (%) | 131 (48.0) | 55 (49.5) | 76 (46.9) | 0.76 |
| PNI | < 45, n (%) | 67 (24.5) | 36 (32.4) | 31 (19.1) | 0.02 |
| CONUT score | ≥ 2, n (%) | 105 (38.5) | 47 (42.3) | 58 (35.8) | 0.34 |
| mGPS | 1-2, n (%) | 28 (10.3) | 15 (13.5) | 13 (8.0) | 0.21 |
| Operative time (min) | median [IQR] | 274 [234, 317] | 283 [241, 317] | 270 [226, 318] | 0.20 |
| Bleeding (ml) | median [IQR] | 43.0 [20.0, 105] | 46.0 [20.0, 132] | 38.5 [20.0, 100] | 0.56 |
| pStage | I, n (%) | 174 (63.7) | 69 (62.2) | 105 (64.8) | 0.89 |
| II, n (%) | 53 (19.4) | 23 (20.7) | 30 (18.5) |  |
| III, n (%) | 46 (16.8) | 19 (17.1) | 27 (16.7) |  |
| Postoperative complication (CD) | ≥ Grade III, n (%) | 29 (10.6) | 17 (15.3) | 12 (7.4) | 0.06 |
| Postoperative hospital stay (day) | median [IQR] | 10.0 [9.0, 14.0] | 11.0 [9.0, 17.5] | 10.0 [8.0, 13.0] | 0.004 |
| Adjuvant chemotherapy | Yes, n (%) | 63 (23.1) | 19 (17.1) | 44 (27.2) | 0.07 |

IQR, interquartile range; BMI, body mass index; CEA, carcinoembryonic antigen; CA19-9, carbohydrate antigen; PLR, platelet-to-lymphocyte ratio; NLR, neutrophil-to-lymphocyte ratio; CAR, C-reactive protein–to–albumin ratio; NRI, nutritional risk index; SII, systemic immune-inflammation index; PNI, prognostic nutritional index; CONUT score, controlling nutritional status score; mGPS, modified Glasgow prognostic score; CD, Clavien–Dindo classification.

**Supplementary Table 2** List of clinical and pathological factors for sarcopenia group.

|  |  | Total | Sarcopenia | |  |
| --- | --- | --- | --- | --- | --- |
|  |  |  | Yes | No |  |
|  |  | (n=273) | (n=135) | (n=138) | *P* |
| Sex | Male, n (%) | 189 (69.2) | 93 (68.9) | 96 (69.6) | 1.00 |
| Age (year) | median [IQR] | 68.0 [61.0, 76.0] | 69.0 [62.0, 77.5] | 68.0 [60.0, 74.0] | 0.33 |
| BMI (kg×m-2) | median [IQR] | 22.7 [20.3, 24.4] | 20.8 [19.2, 23.1] | 23.5 [22.1, 25.1] | <0.001 |
| Smoking | Yes, n (%) | 167 (61.2) | 83 (61.5) | 84 (60.9) | 1.00 |
| Neoadjuvant chemotherapy | Yes, n (%) | 18 (6.6) | 14 (10.4) | 4 (2.9) | 0.03 |
| CEA (mg/dl) | ≥ 5, n (%) | 33 (12.1) | 19 (14.1) | 14 (10.1) | 0.42 |
| CA19-9 (U/dl) | ≥ 37, n (%) | 13 (4.8) | 8 (5.9) | 5 (3.6) | 0.54 |
| PLR | ≥ 150, n (%) | 117 (42.9) | 55 (40.7) | 62 (44.9) | 0.56 |
| NLR | ≥ 2.5, n (%) | 96 (35.2) | 50 (37.0) | 46 (33.3) | 0.61 |
| CAR | ≥ 0.05, n (%) | 64 (23.4) | 35 (25.9) | 29 (21.0) | 0.42 |
| NRI | < 100, n (%) | 81 (29.7) | 57 (42.2) | 24 (17.4) | <0.001 |
| SII | ≥ 50x10^4, n (%) | 131 (48.0) | 68 (50.4) | 63 (45.7) | 0.51 |
| PNI | < 45, n (%) | 67 (24.5) | 38 (28.1) | 29 (21.0) | 0.22 |
| CONUT score | ≥ 2, n (%) | 105 (38.5) | 56 (41.5) | 49 (35.5) | 0.37 |
| mGPS | 1-2, n (%) | 28 (10.3) | 16 (11.9) | 12 (8.7) | 0.51 |
| Operative time (min) | median [IQR] | 274 [234, 317] | 270 [218, 314] | 279 [253, 320] | 0.04 |
| Bleeding (ml) | median [IQR] | 43.0 [20.0, 105] | 40.0 [20.0, 100] | 44.5 [20.0, 118] | 0.52 |
| pStage | I, n (%) | 174 (63.7) | 82 (60.7) | 92 (66.7) | 0.48 |
| II, n (%) | 53 (19.4) | 30 (22.2) | 23 (16.7) |  |
| III, n (%) | 46 (16.8) | 23 (17.0) | 23 (16.7) |  |
| Postoperative complication (CD) | ≥ Grade III, n (%) | 29 (10.6) | 11 (8.1) | 18 (13.0) | 0.26 |
| Postoperative hospital stay (day) | median [IQR] | 10.0 [9.0, 14.0] | 11 (8.1) | 18 (13.0) |  |
| Adjuvant chemotherapy | Yes, n (%) | 63 (23.1) | 10.0 [9.0, 14.0] | 10.0 [8.0, 14.0] | 0.81 |

IQR, interquartile range; BMI, body mass index; CEA, carcinoembryonic antigen; CA19-9, carbohydrate antigen; PLR, platelet-to-lymphocyte ratio; NLR, neutrophil-to-lymphocyte ratio; CAR, C-reactive protein–to–albumin ratio; NRI, nutritional risk index; SII, systemic immune-inflammation index; PNI, prognostic nutritional index; CONUT score, controlling nutritional status score; mGPS, modified Glasgow prognostic score; CD, Clavien–Dindo classification.
